# Supplementary material
Source: PubMed Central journal article supplement (PMC10017376)
Supplement: NIHMS1836267-supplement-SUPINFO1.pdf [file NIHMS1836267-supplement-SUPINFO1.pdf]

# Mechanisms of spontaneous Ca<sup>2+</sup> release-mediated arrhythmia in a novel 3D human atrial myocyte model: II. Ca<sup>2+</sup>-handling protein variation

Xianwei Zhang, Charlotte Smith, Stefano Morotti, Andrew Edwards, Daisuke Sato, William E. Louch, Haibo Ni, and Eleonora Grandi

DOI: 10.1113/JP283602

Corresponding author(s): Eleonora Grandi ([egrandi@ucdavis.edu](mailto:egrandi@ucdavis.edu))

The following individual(s) involved in review of this submission have agreed to reveal their identity: Fabien Brette (Referee #1)

---

## Review Timeline:

|                     |             |
|---------------------|-------------|
| Submission Date:    | 18-Jul-2022 |
| Editorial Decision: | 12-Aug-2022 |
| Revision Received:  | 19-Aug-2022 |
| Accepted:           | 02-Sep-2022 |

---

Senior Editor: Bjorn Knollmann

Reviewing Editor: Michael Shattock

## Transaction Report:

(Note: With the exception of the correction of typographical or spelling errors that could be a source of ambiguity, letters and reports are not edited. Depending on transfer agreements, referee reports obtained elsewhere may or may not be included in this compilation. Referee reports are anonymous unless the Referee chooses to sign their reports.)

Dear Professor Grandi,

Re: JP-RP-2022-283602 "Mechanisms of spontaneous Ca<sup>2+</sup> release-mediated arrhythmia in a novel 3D human atrial myocyte model: II. Ca<sup>2+</sup>-handling protein variation" by Xianwei Zhang, Charlotte Smith, Stefano Morotti, Andrew Edwards, Daisuke Sato, William E. Louch, Haibo Ni, and Eleonora Grandi

Thank you for submitting your manuscript to The Journal of Physiology. It has been assessed by a Reviewing Editor and by 2 expert Referees and I am pleased to tell you that it is considered to be acceptable for publication following satisfactory revision.

Please advise your co-authors of this decision as soon as possible.

The reports are copied at the end of this email. Please address all of the points and incorporate all requested revisions, or explain in your Response to Referees why a change has not been made.

**NEW POLICY:** In order to improve the transparency of its peer review process The Journal of Physiology publishes online as supporting information the peer review history of all articles accepted for publication. Readers will have access to decision letters, including all Editors' comments and referee reports, for each version of the manuscript and any author responses to peer review comments. Referees can decide whether or not they wish to be named on the peer review history document.

Authors are asked to use The Journal's premium BioRender (<https://biorender.com/>) account to create/redraw their Abstract Figures. Information on how to access The Journal's premium BioRender account is here: <https://physoc.onlinelibrary.wiley.com/journal/14697793/biorender-access> and authors are expected to use this service. This will enable Authors to download high-resolution versions of their figures. The link provided should only be used for the purposes of this submission. Authors will be charged for figures created on this premium BioRender account if they are not related to this manuscript submission.

I hope you will find the comments helpful and have no difficulty returning your revisions within 4 weeks.

Your revised manuscript should be submitted online using the links in Author Tasks Link Not Available.

Any image files uploaded with the previous version are retained on the system. Please ensure you replace or remove all files that have been revised.

#### REVISION CHECKLIST:

- Article file, including any tables and figure legends, must be in an editable format (eg Word)
- Abstract figure file (see above)
- Statistical Summary Document
- Upload each figure as a separate high quality file
- Upload a full Response to Referees, including a response to any Senior and Reviewing Editor Comments;
- Upload a copy of the manuscript with the changes highlighted.

You may also upload:

- A potential 'Cover Art' file for consideration as the Issue's cover image;
- Appropriate Supporting Information (Video, audio or data set [https://jp.msubmit.net/cgi-bin/main.plex?form\\_type=display\\_requirements#supp](https://jp.msubmit.net/cgi-bin/main.plex?form_type=display_requirements#supp)).

To create your 'Response to Referees' copy all the reports, including any comments from the Senior and Reviewing Editors, into a Word, or similar, file and respond to each point in colour or CAPITALS and upload this when you submit your revision.

I look forward to receiving your revised submission.

If you have any queries please reply to this email and staff will be happy to assist.

Yours sincerely,

Bjorn Knollmann  
Senior Editor  
The Journal of Physiology

-----  
REQUIRED ITEMS FOR REVISION:

-Author photo and profile. First (or joint first) authors are asked to provide a short biography (no more than 100 words for one author or 150 words in total for joint first authors) and a portrait photograph. These should be uploaded and clearly labelled with the revised version of the manuscript. See [Information for Authors](#) for further details.

-Your manuscript must include a complete [Additional Information section](#)

-Please upload separate high-quality [figure files](#) via the submission form.

-Please ensure that the Article File you upload is a Word file.

-A Statistical Summary Document, summarising the statistics presented in the manuscript, is required upon revision. It must be on the Journal's template, which can be downloaded from the link in the Statistical Summary Document section here: [https://jp.msubmit.net/cgi-bin/main.plex?form\\_type=display\\_requirements#statistics](https://jp.msubmit.net/cgi-bin/main.plex?form_type=display_requirements#statistics)

-Papers must comply with the Statistics Policy [https://jp.msubmit.net/cgi-bin/main.plex?form\\_type=display\\_requirements#statistics](https://jp.msubmit.net/cgi-bin/main.plex?form_type=display_requirements#statistics)

In summary:

-If  $n$  {less than or equal to} 30, all data points must be plotted in the figure in a way that reveals their range and distribution. A bar graph with data points overlaid, a box and whisker plot or a violin plot (preferably with data points included) are acceptable formats.

-If  $n > 30$ , then the entire raw dataset must be made available either as supporting information, or hosted on a not-for-profit repository e.g. FigShare, with access details provided in the manuscript.

-' $n$ ' clearly defined (e.g.  $x$  cells from  $y$  slices in  $z$  animals) in the Methods. Authors should be mindful of pseudoreplication.

-All relevant ' $n$ ' values must be clearly stated in the main text, figures and tables, and the Statistical Summary Document (required upon revision)

-The most appropriate summary statistic (e.g. mean or median and standard deviation) must be used. Standard Error of the Mean (SEM) alone is not permitted.

-Exact  $p$  values must be stated. Authors must not use 'greater than' or 'less than'. Exact  $p$  values must be stated to three significant figures even when 'no statistical significance' is claimed.

-Statistics Summary Document completed appropriately upon revision

-A Data Availability Statement is required for all papers reporting original data. This must be in the Additional Information section of the manuscript itself. It must have the paragraph heading "Data Availability Statement". All data supporting the results in the paper must be either: in the paper itself; uploaded as Supporting Information for Online Publication; or archived in an appropriate public repository. The statement needs to describe the availability or the absence of shared data. Authors must include in their Statement: a link to the repository they have used, or a statement that it is available as Supporting Information; reference the data in the appropriate section(s) of their manuscript; and cite the data they have shared in the References section. Whenever possible the scripts and other artefacts used to generate the analyses presented in the

paper should also be publicly archived. If sharing data compromises ethical standards or legal requirements then authors are not expected to share it, but must note this in their Statement. For more information, see our [Statistics Policy](#).

-Please include an Abstract Figure. The Abstract Figure is a piece of artwork designed to give readers an immediate understanding of the research and should summarise the main conclusions. If possible, the image should be easily 'readable' from left to right or top to bottom. It should show the physiological relevance of the manuscript so readers can assess the importance and content of its findings. Abstract Figures should not merely recapitulate other figures in the manuscript. Please try to keep the diagram as simple as possible and without superfluous information that may distract from the main conclusion(s). Abstract Figures must be provided by authors no later than the revised manuscript stage and should be uploaded as a separate file during online submission labelled as File Type 'Abstract Figure'. Please ensure that you include the figure legend in the main article file. All Abstract Figures should be created using BioRender. Authors should use The Journal's premium BioRender account to export high-resolution images. Details on how to use and access the premium account are included as part of this email.

-----  
EDITOR COMMENTS

Reviewing Editor:

Both reviewers commented on the quality of the work and it's likely impact. Subject to some minor revisions as requested, both papers should be acceptable as back-to-back publications. Congratulations on some very nice work.

-----  
REFEREE COMMENTS

Referee #1:

This work presents new information regarding the contribution of Ca handling proteins in atrial myocytes using computer model. The authors developed and validated a new model of 3D human atrial myocyte in the companion paper. Here, they examined the impact of TATS density and changes in expression and distribution of Ca-handling proteins (Na-Ca exchanger, Ryanodine receptor, Calsquestrin) related to atrial fibrillation (10 to 200% changes). For all 3 key actors, varying expression and localization has pro and anti-arrhythmic effects (investigated as spontaneous Ca release, delayed after depolarization and spontaneous action potential). Biphasic effects are observed. Intermediately tubulated atrial myocytes showed profound effect whereas detubulated (sparse) myocytes appear unaffected and densely tubulated protected. Inner uncoupled Ca release units appear the main culprit for arrhythmia. Interestingly some modeling data showed change in Ca-Vm coupling.

This study is a logical follow-up of the companion paper. The model data are compared to relevant literature (cardiac disease, KO mice) and go even further. We can clearly see the power of computer modeling. As the previous paper, this is an excellent study and will benefit the field. The study is well-written and well executed. I have very few concerns to raise, mostly some suggestions for the authors to expand upon:

In this paper atrial fibrillation is well explained, but see my comments on the first study, where it should be introduced as well and therefore re-arrange the 2 papers.

Two translational points could be more discussed:

The modeling data suggest that increasing Na-Ca exchanger density may be protective against Ca overload. As the authors wrote currently an inhibition is though to more relevant clinically. A special issue in Cell Calcium deals with "Na-dependent transporters" not only in the heart and Na-Ca exchanger activators are presented in neurons (Cell Calcium, 2020 vol 87). Can the authors discuss briefly this point?

The modeling data suggest that intermediately tubulated atrial myocytes are more prone to arrhythmogenic events. One way to reduce these events would be to "re-tubulate" cells and this is also a great deal in heart failure for ventricular myocytes. Recently, several studies are interested in the formation/proliferation of t-tubules not only in myocytes but also in iPS, a small transitional paragraph about this point could be add.

Referee #2:

This paper assesses the impact TATS remodeling along with varying the subcellular distribution of NCX1, RyR2, and CSQ to atrial arrhythmogenesis with the use of a new computational model. The authors show that the variation of Ca handling proteins had the strongest impact in cells with intermediate TATS. This paper is a nice extension of the accompanying paper, in which the computational model was built. My comments are only minor.

- Again SCRs and DADs occur in isolated atrial myocytes from sinus rhythm and AF patients (more in the later than in the former) in the absence of t-tubule and TATS. I suggest to stress this issue to the readers and add some discussion on this issue.

- RyR2 variation: SCRs are increased in patients with paroxysmal AF (Beavers et al., JACC 2013; Voigt et al., Circ 2014) and this occurs likely because of increased RyR2 channel expression in the face of no t-tubules and TATS. You should also refer to the many animal models of atria tachycardia remodeling in which a reduction of total RyR2 expression also occur as part of the underlying proarrhythmic substrate.

- RyR2 function is also increased in the atria of patients with HFrEF, despite the fact that total RyR2 levels were reduced (PMID: 30356673). This should mentioned.

- LCC variation: Christ et al. 2004 do not show a decrease in LCC expression, although the current is reduced in AF patients.

---

END OF COMMENTS

**Confidential Review**

**18-Jul-2022**

---



### EDITOR COMMENTS

Reviewing Editor:

Both reviewers commented on the quality of the work and it's likely impact. Subject to some minor revisions as requested, both papers should be acceptable as back-to-back publications. Congratulations on some very nice work.

Senior Editor:

I concur with the expert reviewing editor's assessment. Excellent work.

We thank the reviewing and senior editors for their positive notes. We appreciate the reviewer's assessment and critiques and have addressed all comments in the revised manuscript. Specific changes are highlighted in our point-by-point rebuttal and tracked in the manuscript.

Referee #1:

This work presents new information regarding the contribution of Ca handling proteins in atrial myocytes using computer model. The authors developed and validated a new model of 3D human atrial myocyte in the companion paper. Here, they examined the impact of TATS density and changes in expression and distribution of Ca-handling proteins (Na-Ca exchanger, Ryanodine receptor, Calsquestrin) related to atrial fibrillation (10 to 200% changes). For all 3 key actors, varying expression and localization has pro and anti-arrhythmic effects (investigated as spontaneous Ca release, delayed after depolarization and spontaneous action potential). Biphasic effects are observed. Intermediately tubulated atrial myocytes showed profound effect whereas detubulated (sparse) myocytes appear unaffected and densely tubulated protected. Inner uncoupled Ca release units appear the main culprit for arrhythmia. Interestingly some modeling data showed change in  $C_{ai}$ - $V_m$  coupling.

This study is a logical follow-up of the companion paper. The model data are compared to relevant literature (cardiac disease, KO mice) and go even further. We can clearly see the power of computer modeling. As the previous paper, this is an excellent study and will benefit the field. The study is well-written and well executed. I have very few concerns to raise, mostly some suggestions for the authors to expand upon:

We appreciate the reviewer's positive assessment and useful suggestions for improvement.

1. In this paper atrial fibrillation is well explained, but see my comments on the first study, where it should be introduced as well and therefore re-arrange the 2 papers.

Thank you, point well taken. We chose to add a paragraph in the first paper rather than rearranging content.

Two translational points could be more discussed:

2. The modeling data suggest that increasing Na-Ca exchanger density may be protective against Ca overload. As the authors wrote currently an inhibition is thought to be more relevant clinically. A special issue in Cell Calcium deals with "Na-dependent transporters" not only in the heart and

Na-Ca exchanger activators are presented in neurons (Cell Calcium, 2020 vol 87). Can the authors discuss briefly this point?

Thank you for this suggestion. We added a brief discussion on Na-Ca exchanger activators (lines 466-474): ***“While NCX inhibition is thought to be more relevant to cardiac disease clinically, it is interesting to note that pharmacological NCX activators are emerging as promising strategies to ameliorate certain neurodegenerative diseases (Annunziato et al., 2020), such as stroke, neonatal hypoxia, multiple sclerosis, amyotrophic lateral sclerosis, Alzheimer’s disease, Parkinson’s disease, and spinal muscular atrophy. In neuronal cells, various NCX isoforms work to maintain Na<sup>+</sup> and Ca<sup>2+</sup> homeostasis in the cytosol, endoplasmic reticulum, and mitochondria via both forward and reverse mode operation; and have been shown to increase survival of neuronal and glial-derived cells in pathophysiologic conditions (Annunziato et al., 2020; Pannaccione et al., 2020).”***

3. The modeling data suggest that intermediately tubulated atrial myocytes are more prone to arrhythmogenic events. One way to reduce these events would be to "re-tubulate" cells and this is also a great deal in heart failure for ventricular myocytes. Recently, several studies are interested in the formation/proliferation of t-tubules not only in myocytes but also in iPS, a small transitional paragraph about this point could be add.

We agree and briefly discussed current efforts to “re-tubulate” adult myocytes and iPS (lines 413-418): ***“Recent studies have investigated t-tubule restoration as a therapeutic maneuver in cardiac disease, especially in HF, and suggest that therapeutic t-tubule protection and repair may benefit inotropy while inhibiting arrhythmia (Manfra et al., 2017). Analogously, several groups endeavored to optimize experimental conditions to produce human induced pluripotent derived cardiomyocytes with functional t-tubule networks (Parikh et al., 2017).”***

Referee #2:

This paper assesses the impact TATS remodeling along with varying the subcellular distribution of NCX1, RyR2, and CSQ to atrial arrhythmogenesis with the use of a new computational model. The authors show that the variation of Ca handling proteins had the strongest impact in cells with intermediate TATS. This paper is a nice extension of the accompanying paper, in which the computational model was built. My comments are only minor.

1. Again SCRs and DADs occur in isolated atrial myocytes from sinus rhythm and AF patients (more in the later than in the former) in the absence of t-tubule and TATS. I suggest to stress this issue to the readers and add some discussion on this issue.

We agree and added this also in the introduction of this second paper, which indeed deals with studying other factors that may be contributing to the proarrhythmic behavior at various stages of TATS remodeling (lines 116-122): ***“Nevertheless, SCRs and DADs occur more frequently in AF vs. sinus rhythm human atrial myocytes that both mostly lack TATS after isolation via enzymatic digestion (though a fairly robust TATS presence is seen in human atrial tissue (Richards et al., 2011)). Indeed, the reduced density and regularity of the TATS is one aspect of disease remodeling, and it occurs concomitantly with altered channel and transporter expression, regulatory state, and function, as well as subcellular redistribution of ion channels, transporters, and Ca<sup>2+</sup> handling proteins.”***

2. RyR2 variation: SCRs are increased in patients with paroxysmal AF (Beavers et al., JACC 2013; Voigt et al., Circ 2014) and this occurs likely because of increased RyR2 channel



expression in the face of no t-tubules and TATS. You should also refer to the many animal models of atria tachycardia remodeling in which a reduction of total RyR2 expression also occur as part of the underlying proarrhythmic substrate.

We added these important papers (lines 494-498). ***“SCRs are increased in myocytes isolated from patients with paroxysmal AF lacking TATS likely because of increased RyR channel expression (Beavers et al., 2013; Voigt et al., 2014). Conversely, a reduction in RyR expression is seen in several animal models of atrial tachycardia remodeling as part of the underlying proarrhythmic substrate (Lenaerts et al., 2009; Wakili et al., 2010; Lugenbiel et al., 2015).”***

3. RyR2 function is also increased in the atria of patients with HFrEF, despite the fact that total RyR2 levels were reduced (PMID: 30356673). This should mentioned.

Thank you, we added this (lines 498-500). ***“Notably, despite reduced total RyR protein levels in the atria of patients with systolic HF, RyR function was found to be increased (Molina et al., 2018).”***

4. LCC variation: Christ et al. 2004 do not show a decrease in LCC expression, although the current is reduced in AF patients.

Thank you, we corrected this (line 556).

Dear Ele,

Re: JP-RP-2022-283602R1 "Mechanisms of spontaneous Ca<sup>2+</sup> release-mediated arrhythmia in a novel 3D human atrial myocyte model: II. Ca<sup>2+</sup>-handling protein variation" by Xianwei Zhang, Charlotte Smith, Stefano Morotti, Andrew Edwards, Daisuke Sato, William E. Louch, Haibo Ni, and Eleonora Grandi

I am pleased to tell you that your paper has been accepted for publication in The Journal of Physiology.

**NEW POLICY:** In order to improve the transparency of its peer review process The Journal of Physiology publishes online as supporting information the peer review history of all articles accepted for publication. Readers will have access to decision letters, including all Editors' comments and referee reports, for each version of the manuscript and any author responses to peer review comments. Referees can decide whether or not they wish to be named on the peer review history document.

The last Word version of the paper submitted will be used by the Production Editors to prepare your proof. When this is ready you will receive an email containing a link to Wiley's Online Proofing System. The proof should be checked and corrected as quickly as possible.

Authors should note that it is too late at this point to offer corrections prior to proofing. The accepted version will be published online, ahead of the copy edited and typeset version being made available. Major corrections at proof stage, such as changes to figures, will be referred to the Reviewing Editor for approval before they can be incorporated. Only minor changes, such as to style and consistency, should be made a proof stage. Changes that need to be made after proof stage will usually require a formal correction notice.

All queries at proof stage should be sent to TJP@wiley.com

Are you on Twitter? Once your paper is online, why not share your achievement with your followers. Please tag The Journal (@jphysiol) in any tweets and we will share your accepted paper with our 23,000+ followers!

Yours sincerely,

Bjorn Knollmann  
Senior Editor  
The Journal of Physiology

P.S. - You can help your research get the attention it deserves! Check out Wiley's free Promotion Guide for best-practice recommendations for promoting your work at [www.wileyauthors.com/eoo/guide](http://www.wileyauthors.com/eoo/guide). And learn more about Wiley Editing Services which offers professional video, design, and writing services to create shareable video abstracts, infographics, conference posters, lay summaries, and research news stories for your research at [www.wileyauthors.com/eoo/promotion](http://www.wileyauthors.com/eoo/promotion).

**\* IMPORTANT NOTICE ABOUT OPEN ACCESS \***

To assist authors whose funding agencies mandate public access to published research findings sooner than 12 months after publication The Journal of Physiology allows authors to pay an open access (OA) fee to have their papers made freely available immediately on publication.

You will receive an email from Wiley with details on how to register or log-in to Wiley Authors Services where you will be able to place an OnlineOpen order.

You can check if you funder or institution has a Wiley Open Access Account here <https://authorservices.wiley.com/author-resources/Journal-Authors/licensing-and-open-access/open-access/author-compliance-tool.html>

Your article will be made Open Access upon publication, or as soon as payment is received.

If you wish to put your paper on an OA website such as PMC or UKPMC or your institutional repository within 12 months of publication you must pay the open access fee, which covers the cost of publication.

OnlineOpen articles are deposited in PubMed Central (PMC) and PMC mirror sites. Authors of OnlineOpen articles are permitted to post the final, published PDF of their article on a website, institutional repository, or other free public server, immediately on publication.

Note to NIH-funded authors: The Journal of Physiology is published on PMC 12 months after publication, NIH-funded

authors DO NOT NEED to pay to publish and DO NOT NEED to post their accepted papers on PMC.

-----  
EDITOR COMMENTS

Reviewing Editor:

No further comments.

Senior Editor:

Wonderful study, congratulations!

-----

**1st Confidential Review**

**19-Aug-2022**

---
